# Supplementary material
Source: PubMed Central journal article supplement (PMC5876883)
Supplement: jamaophthalmol-136-490-s001.pdf [file jamaophthalmol-136-490-s001.pdf]

## Supplementary Online Content

Berson EL, Weigel-DiFranco C, Rosner B, Gaudio AR, Sandberg MA.  
Association of vitamin A supplementation with disease course in children with  
retinitis pigmentosa. *JAMA Ophthalmol*. Published online March 29, 2018.  
doi:10.1001/jamaophthalmol.2018.0590

**eTable 1.** Repeated-Measures Longitudinal Regression of Log<sub>e</sub> Cone ERG  
Amplitude to 30-Hz Flashes on Model 2 Variables

**eTable 2.** Repeated-Measures Longitudinal Regression of Log<sub>e</sub> Visual Field Area  
on Model 3 Variables

**eTable 3.** Repeated-Measures Longitudinal Regression of Log<sub>e</sub> Visual Acuity on  
Model 3 Variables

This supplementary material has been provided by the authors to give readers  
additional information about their work.

**eTable 1**

**Repeated-measures Longitudinal Regression  
of Log<sub>e</sub> Cone ERG Amplitude to 30-Hz Flashes on Model 2 Variables**

| Effect                                                               | Genetic Type | Eye | Estimate | Standard Error | 95% Confidence Interval | DF  | t Value | Pr >  t |
|----------------------------------------------------------------------|--------------|-----|----------|----------------|-------------------------|-----|---------|---------|
| Intercept <sup>a</sup>                                               |              |     | 2.1104   | 0.2394         | 1.6334, 2.5874          | 75  | 8.81    | <.0001  |
| Time <sup>a,b</sup>                                                  |              |     | -0.1269  | 0.0364         | -0.1984, -0.0554        | 385 | -3.49   | 0.0005  |
| Vitamin A                                                            |              |     | 0.0454   | 0.2037         | -0.3604, 0.4513         | 75  | 0.22    | 0.8241  |
| Eye                                                                  |              | OD  | -0.0113  | 0.0544         | -0.1198, 0.0972         | 67  | -0.21   | 0.8358  |
| Eye                                                                  |              | OS  | 0        | .              | .                       | .   | .       | .       |
| Genetic Type                                                         | Recessive    |     | -0.5466  | 0.2463         | -1.0372, -0.0561        | 75  | -2.22   | 0.0295  |
| Genetic Type                                                         | X-linked     |     | -1.0972  | 0.2751         | -1.6452, -0.5492        | 75  | -3.99   | 0.0002  |
| Genetic Type                                                         | Unknown      |     | -0.1401  | 0.2912         | -0.7201, 0.4400         | 75  | -0.48   | 0.6318  |
| Genetic Type                                                         | Dominant     |     | 0        | .              | .                       | .   | .       | .       |
| Baseline Implicit Time <sup>b</sup>                                  |              |     | -0.0700  | 0.0158         | -0.1010, -0.0390        | 385 | -4.44   | <.0001  |
| Time <sup>b</sup> x Vitamin A                                        |              |     | 0.0771   | 0.0295         | 0.0191, 0.1350          | 385 | 2.61    | 0.0093  |
| Time <sup>b</sup> x Eye                                              |              | OD  | 0.0037   | 0.0075         | -0.0109, 0.0183         | 385 | 0.50    | 0.6162  |
| Time <sup>b</sup> x Eye                                              |              | OS  | 0        | .              | .                       | .   | .       | .       |
| Time <sup>b</sup> x Genetic Type                                     | Recessive    |     | -0.0027  | 0.03848        | -0.0784, 0.0729         | 385 | -0.07   | 0.9436  |
| Time <sup>b</sup> x Genetic Type                                     | X-linked     |     | -0.0716  | 0.0390         | -0.1483, 0.0051         | 385 | -1.84   | 0.0672  |
| Time <sup>b</sup> x Genetic Type                                     | Unknown      |     | -0.0124  | 0.0435         | -0.0979, 0.0731         | 385 | -0.29   | 0.7754  |
| Time <sup>b</sup> x Genetic Type                                     | Dominant     |     | 0        | .              | .                       | .   | .       | .       |
| Time <sup>b</sup> x Baseline Implicit Time <sup>b</sup>              |              |     | -0.0112  | 0.0024         | -0.0159, -0.0066        | 385 | -4.75   | <.0001  |
| Time <sup>b</sup> x Log <sub>e</sub> Baseline Amplitude <sup>b</sup> |              |     | -0.0370  | 0.0096         | -0.0560, -0.0181        | 385 | -3.84   | 0.0001  |

<sup>a</sup>The reference categories are Dominant for Genetic Type and OS for Eye. Therefore, the results for Intercept and Time apply to the left eye of patients with dominant disease.

<sup>b</sup>Mean-centered.

### Type 3 Tests for Repeated-measures Longitudinal Regression of Log<sub>e</sub> Cone ERG Amplitude to 30-Hz Flashes on Model 2 Variables

| Effect                                                               | Num DF | Den DF | F Value | Pr > F |
|----------------------------------------------------------------------|--------|--------|---------|--------|
| Time <sup>a</sup>                                                    | 1      | 385    | 35.08   | <.0001 |
| Vitamin A                                                            | 1      | 75     | 0.05    | 0.8241 |
| Eye                                                                  | 1      | 67     | 0.04    | 0.8358 |
| Genetic Type                                                         | 3      | 75     | 6.27    | 0.0007 |
| Baseline Implicit Time <sup>a</sup>                                  | 1      | 385    | 19.70   | <.0001 |
| Time <sup>a</sup> x Vitamin A                                        | 1      | 385    | 6.83    | 0.0093 |
| Time <sup>a</sup> x Eye                                              | 1      | 385    | 0.25    | 0.6162 |
| Time <sup>a</sup> x Genetic Type                                     | 3      | 385    | 2.00    | 0.1136 |
| Time <sup>a</sup> x Baseline Implicit Time <sup>a</sup>              | 1      | 385    | 22.55   | <.0001 |
| Time <sup>a</sup> x Log <sub>e</sub> Baseline Amplitude <sup>a</sup> | 1      | 385    | 14.73   | 0.0001 |

<sup>a</sup>Mean-centered

**eTable 2**

**Repeated-measures Longitudinal Regression  
of Log<sub>e</sub> Visual Field Area on Model 3 Variables**

| Effect                           | Genetic Type | Eye | Estimate | Standard Error | 95% Confidence Interval | DF  | t Value | Pr >  t |
|----------------------------------|--------------|-----|----------|----------------|-------------------------|-----|---------|---------|
| Intercept <sup>a</sup>           |              |     | 8.9947   | 0.1503         | 8.6949, 9.2946          | 69  | 59.85   | <.0001  |
| Time <sup>a,b</sup>              |              |     | 0.01040  | 0.03796        | -0.06422, 0.08502       | 419 | 0.27    | 0.7843  |
| Vitamin A                        |              |     | 0.1803   | 0.1265         | -0.07211, 0.4327        | 69  | 1.43    | 0.1587  |
| Eye                              |              | OD  | 0.002831 | 0.01883        | -0.03470, 0.04037       | 73  | 0.15    | 0.8809  |
| Eye                              |              | OS  | 0        | .              | .                       | .   | .       | .       |
| Genetic Type                     | Recessive    |     | -0.01272 | 0.1526         | -0.3172, 0.2917         | 69  | -0.08   | 0.9338  |
| Genetic Type                     | X-linked     |     | 0.1456   | 0.1757         | -0.2048, 0.4961         | 69  | 0.83    | 0.4100  |
| Genetic Type                     | Unknown      |     | -0.08092 | 0.1800         | -0.4399, 0.2781         | 69  | -0.45   | 0.6544  |
| Genetic Type                     | Dominant     |     | 0        | .              | .                       | .   | .       | .       |
| Time <sup>b</sup> x Vitamin A    |              |     | 0.003697 | 0.03064        | -0.05653, 0.06392       | 419 | 0.12    | 0.9040  |
| Time <sup>b</sup> x Eye          |              | OD  | 0.004174 | 0.004309       | -0.00429, 0.0126        | 419 | 0.97    | 0.3332  |
| Time <sup>b</sup> x Eye          |              | OS  | 0        | .              | .                       | .   | .       | .       |
| Time <sup>b</sup> x Genetic Type | Recessive    |     | 0.000539 | 0.03754        | -0.07325, 0.07433       | 419 | 0.01    | 0.9886  |
| Time <sup>b</sup> x Genetic Type | X-linked     |     | -0.02219 | 0.04387        | -0.1084, 0.06405        | 419 | -0.51   | 0.6133  |
| Time <sup>b</sup> x Genetic Type | Unknown      |     | 0.03670  | 0.04302        | -0.04787, 0.1213        | 419 | 0.85    | 0.3941  |
| Time <sup>b</sup> x Genetic Type | Dominant     |     | 0        | .              | .                       | .   | .       | .       |

<sup>a</sup>The reference categories are Dominant for Genetic Type and OS for Eye. Therefore, the results for Intercept and Time apply to the left eye of patients with dominant disease.

<sup>b</sup>Mean-centered.

**Type 3 Tests for Repeated-measures Longitudinal Regression  
of Log<sub>e</sub> Visual Field Area on Model 3 Variables**

| Effect            | Num DF | Den DF | F Value | Pr > F |
|-------------------|--------|--------|---------|--------|
| Time <sup>a</sup> | 1      | 419    | 0.41    | 0.5229 |
| Vitamin A         | 1      | 69     | 2.03    | 0.1587 |
| Eye               | 1      | 73     | 0.02    | 0.8809 |

|                                  |   |     |      |        |
|----------------------------------|---|-----|------|--------|
| Genetic Type                     | 3 | 69  | 0.56 | 0.6465 |
| Time <sup>a</sup> x Vitamin A    | 1 | 419 | 0.01 | 0.9040 |
| Time <sup>a</sup> x Eye          | 1 | 419 | 0.94 | 0.3332 |
| Time <sup>a</sup> x Genetic Type | 3 | 419 | 0.68 | 0.5672 |

<sup>a</sup>Mean-centered

**eTable 3****Repeated-measures Longitudinal Regression of Log<sub>e</sub> Visual Acuity on Model 3 Variables**

| Effect                           | Genetic Type | Eye | Estimate | Standard Error | 95% Confidence Interval | DF  | t Value | Pr >  t |
|----------------------------------|--------------|-----|----------|----------------|-------------------------|-----|---------|---------|
| Intercept <sup>a</sup>           |              |     | -0.5704  | 0.0860         | -0.7423, -0.3986        | 64  | -6.63   | <.0001  |
| Time <sup>a,b</sup>              |              |     | -0.0017  | 0.0241         | -0.0491, 0.0458         | 316 | -0.07   | 0.9452  |
| Vitamin A                        |              |     | 0.1270   | 0.0714         | -0.0157, 0.2696         | 64  | 1.78    | 0.0801  |
| Eye                              |              | OD  | 0.0777   | 0.0345         | 0.0085, 0.1468          | 53  | 2.25    | 0.0284  |
| Eye                              |              | OS  | 0        | .              | .                       | .   | .       | .       |
| Genetic Type                     | Recessive    |     | -0.0849  | 0.0905         | -0.2657, 0.0960         | 64  | -0.94   | 0.3520  |
| Genetic Type                     | X-linked     |     | -0.1243  | 0.0976         | -0.3193, 0.0708         | 64  | -1.27   | 0.2076  |
| Genetic Type                     | Unknown      |     | -0.1851  | 0.1033         | -0.3913, 0.0212         | 64  | -1.79   | 0.0778  |
| Genetic Type                     | Dominant     |     | 0        | .              | .                       | .   | .       | .       |
| Time <sup>b</sup> x Vitamin A    |              |     | 0.0124   | 0.0185         | -0.0239, 0.0487         | 316 | 0.67    | 0.5016  |
| Time <sup>b</sup> x Eye          |              | OD  | 0.0052   | 0.0080         | -0.0106, 0.0209         | 316 | 0.65    | 0.5192  |
| Time <sup>b</sup> x Eye          |              | OS  | 0        | .              | .                       | .   | .       | .       |
| Time <sup>b</sup> x Genetic Type | Recessive    |     | -0.0087  | 0.0251         | -0.0582, 0.0407         | 316 | -0.35   | 0.7286  |
| Time <sup>b</sup> x Genetic Type | X-linked     |     | 0.0023   | 0.0249         | -0.0468, 0.0513         | 316 | 0.09    | 0.9276  |
| Time <sup>b</sup> x Genetic Type | Unknown      |     | 0.0158   | 0.0273         | -0.0378, 0.0695         | 316 | 0.58    | 0.5619  |
| Time <sup>b</sup> x Genetic Type | Dominant     |     | 0        | .              | .                       | .   | .       | .       |

<sup>a</sup>The reference categories are Dominant for Genetic Type and OS for Eye. Therefore, the results for Intercept and Time apply to the left eye of patients with dominant disease.

<sup>b</sup>Mean-centered.

**Type 3 Tests for Repeated-measures Longitudinal Regression of Log<sub>e</sub>  
Visual Acuity on Model 3 Variables**

| <b>Effect</b>                    | <b>Num DF</b> | <b>Den DF</b> | <b>F Value</b> | <b>Pr &gt; F</b> |
|----------------------------------|---------------|---------------|----------------|------------------|
| Time <sup>a</sup>                | 1             | 316           | 0.04           | 0.8355           |
| Vitamin A                        | 1             | 64            | 3.16           | 0.0801           |
| Eye                              | 1             | 53            | 5.08           | 0.0284           |
| Genetic Type                     | 3             | 64            | 1.17           | 0.3286           |
| Time <sup>a</sup> x Vitamin A    | 1             | 316           | 0.45           | 0.5016           |
| Time <sup>a</sup> x Eye          | 1             | 316           | 0.42           | 0.5192           |
| Time <sup>a</sup> x Genetic Type | 3             | 316           | 0.52           | 0.6656           |

<sup>a</sup>Mean-centered
